## EDITORIAL VIEWS

RM, Reves JG: Jugular bulb saturation and cognitive dysfunction after cardiopulmonary bypass. *Ann Thorac Surg* 1994; 58:1702-8

7. Newman MF, Croughwell ND, Blumenthal JA, White WD, Lewis JB, Smith LR, Frasco P, Towner EA, Schell RM, Hurwitz BJ, Reves JG: Effect of aging on cerebral autoregulation during cardiopulmonary bypass. Association with postoperative cognitive dysfunction. *Circulation* 1994; 90 [part 2]:II-243-9

8. Newman MF, Kramer D, Croughwell ND, Sanderson I, Blumenthal JA, White WD, Smith LR, Towner EA, Reves JG: Differential age effects of mean arterial pressure and rewarming on cognitive dysfunction after cardiac surgery. *Anesth Analg* 1995; 81:236-42

9. Goto T, Yoshitake A, Baba T, Shibata Y, Sakata R, Uozumi H: Cerebral ischemic disorders and cerebral oxygen balance during cardiopulmonary bypass surgery: Preoperative evaluation using magnetic resonance imaging and angiography. *Anesth Analg* 1997; 84:5-11

10. Dexter F, Hindman BJ: Theoretical analysis of cerebral venous oxygen saturation as an index of cerebral oxygenation during hypothermic cardiopulmonary bypass: A counter-proposal to the "luxury perfusion" hypothesis. *ANESTHESIOLOGY* 1995; 83:405-12

11. Enomoto S, Hindman BJ, Dexter F, Smith T, Cutkomp J: Rapid rewarming causes an increase in the cerebral metabolic rate for oxygen that is temporarily unmatched by cerebral blood flow. A study during cardiopulmonary bypass in rabbits. *ANESTHESIOLOGY* 1996; 84:1392-400

12. Nakajima T, Kuro M, Hayashi Y, Kitaguchi K, Uchida O, Takaki O: Clinical evaluation of cerebral oxygen balance during cardiopulmonary bypass: On-line continuous monitoring of jugular venous oxyhemoglobin saturation. *Anesth Analg* 1992; 74:630-5

13. Sapire KJ, Gopinath SP, Farhat G, Thakar DR, Gabrielli A, Jones JW, Robertson CS, Chance B: Cerebral oxygenation during warming after cardiopulmonary bypass. *Crit Care Med* 1997; 25:1655-62

14. Maruyama M, Shimoji K, Ichikawa T, Hashiba M, Naito E: The effects of extreme hemodilutions on the autoregulation of cerebral blood flow, electroencephalogram and cerebral metabolic rate of oxygen in the dog. *Stroke* 1985; 16:675-9

15. Todd MM, Wu B, Maktabi M, Hindman BJ, Warner DS: Cerebral blood flow and oxygen delivery during hypoxemia and anemia: The role of arterial oxygen content. *Am J Physiol* 1994; 267:H2025-31

16. Cook DJ, Oliver WC, Orszulak TA, Daly RC: A prospective, randomized comparison of cerebral venous oxygen saturation during normothermic and hypothermic cardiopulmonary bypass. *J Thorac Cardiovasc Surg* 1994; 107:1020-9

17. Cook DJ, Oliver WC, Orszulak TA, Daly RC, Bryce RD: Cardiopulmonary bypass temperature, hematocrit, and cerebral oxygen delivery in humans. *Ann Thorac Surg* 1995; 60:1671-7

18. Korosue K, Heros RC: Mechanism of cerebral blood flow augmentation by anemia in rabbits. *Stroke* 1992; 23:1487-93

19. Dexter F, Hindman BJ: Effect of haemoglobin concentration on brain oxygenation in focal stroke: A mathematical modelling study. *Br J Anaesth* 1997; 79:346-51

Anesthesiology

1998; 89:5-7

© 1998 American Society of Anesthesiologists, Inc.

Lippincott-Raven Publishers

## Choice of $\alpha$ -stat or pH-stat Management and Neurologic Outcomes after Cardiac Surgery

### It Depends

IT has been slightly more than 10 years since Murkin *et al.*<sup>1</sup> reported that pH-stat management results in greater cerebral blood flow (CBF) during cardiopulmonary bypass (CPB) than does  $\alpha$ -stat management. After this land-

mark study, numerous animal and clinical studies have addressed the question of which technique might be best for the brain during cardiac surgery. It appears we may now have the answer—it depends. In children undergoing deep hypothermic circulatory arrest (DHCA), pH-stat should be used. In adults undergoing routine cardiac surgery,  $\alpha$ -stat should be used. Why the difference?

Two clinical studies, one retrospective<sup>2</sup> and a recent prospective randomized trial,<sup>3</sup> find better neurologic outcome with pH-stat management in children undergoing DHCA. In this issue of *ANESTHESIOLOGY*, Kurth *et al.*<sup>4</sup> provide important new insight into two mechanisms by which pH-stat management may be helping the brain during DHCA. First, their work shows that pH-stat management increases the rate of brain cooling, probably on the basis of greater CBF with pH-stat. Although the

This Editorial View accompanies the following article: Kurth CD, O'Rourke MM, O'Hara IB: Comparison of pH-stat and alpha-stat cardiopulmonary bypass on cerebral oxygenation and blood flow in relation to hypothermic circulatory arrest in piglets. *ANESTHESIOLOGY* 1998; 89:110-8.

Accepted for publication April 2, 1998.

Key words: Acidosis; brain; carbon dioxide; cardiopulmonary bypass; cerebral blood flow; hypothermia; hypoxia; ischemia; near infrared spectroscopy; neonate; oxygen.



effect is fairly small, it is nonetheless important because clinical studies suggest brain cooling often may be incomplete before DHCA when  $\alpha$ -stat management is used.<sup>5,6</sup> Thus *pH*-stat management may provide extra brain protection during DHCA simply by increasing the likelihood that the desired level of cerebral hypothermia is actually clinically achieved. The other important finding of this experiment is that the rate of brain oxygen depletion during DHCA is considerably slower with *pH*-stat than with  $\alpha$ -stat management. *pH*-stat management was found to substantively prolong the interval between onset of arrest and exhaustion of brain oxygen stores. At profound hypothermia (17°C), *pH*-stat management reduces brain oxygen consumption an additional 30–40% below that achieved with  $\alpha$ -stat management.<sup>7,8</sup> This supplemental reduction of brain oxygen consumption may underlie Kurth's observation of a slower rate of oxygen depletion with use of *pH*-stat management. Prevention of cellular oxygen exhaustion may greatly increase the brain's tolerance to DHCA.

In contrast, in adults undergoing continuous moderately hypothermic CPB, three randomized prospective studies indicate postoperative neurologic or neuropsychological outcome is slightly, but consistently, better with  $\alpha$ -stat.<sup>9–11</sup> The mechanism is not known, but it is presumed that the lesser CBF of  $\alpha$ -stat management results in fewer cerebral emboli during CPB. In adult cardiac surgery patients, postoperative neurologic outcome is related, at least in part, to the number of cerebral emboli that occur during surgery.<sup>12–15</sup> In contrast to DHCA, global impairment of brain oxygenation during continuous CPB does not appear to be a major mechanism of neurologic injury in adults.<sup>16,17</sup> With use of membrane oxygenators or arterial line filters, the rate of cerebral embolization during CPB often is pretty low. Therefore, with short bypass runs, the number of emboli originating from the CPB circuit may be sufficiently small so that acid-base management may not significantly affect neurologic outcome. Consistent with this hypothesis, Murkin *et al.* reported that  $\alpha$ -stat management was not associated with better neurologic outcome until CPB durations exceeded 90 min.<sup>11</sup> Overall in adults undergoing continuous CPB, the weight of current evidence favors use of  $\alpha$ -stat.

During the past 10 years, integration of laboratory and clinical investigations have lead to mechanistic insight and improved neurologic outcomes after pediatric and adult cardiac surgery. Once mysterious, mechanisms of brain injury during cardiac surgery are becoming more clear. Because the brain can be injured in more than one

way during cardiac surgery, our approach to prevention and treatment will depend on the nature of the injury.

**Bradley J. Hindman, M.D.**

Department of Anesthesia  
The University of Iowa  
College of Medicine  
Iowa City, Iowa 52242

## References

1. Murkin JM, Farrar JK, Tweed A, McKenzie FN, Guiraudon G: Cerebral autoregulation and flow/metabolism coupling during cardiopulmonary bypass: The influence of  $P_aCO_2$ . *Anesth Analg* 1987; 66:825–32
2. Jonas RA, Bellinger DC, Rappaport LA, Wernovsky G, Hickey PR, Farrell DM, Newburger JW: Relation of *pH* strategy and developmental outcome after hypothermic circulatory arrest. *J Thorac Cardiovasc Surg* 1993; 106:362–8
3. du Plessis AJ, Jonas RA, Wypij D, Hickey PR, Riviello J, Wessel DL, Roth SJ, Burrows FA, Walter G, Farrell DM, Walsh AZ, Plumb CA, del Nido P, Burke RP, Castaneda AR, Mayer JE, Newburger JW: Perioperative effects of alpha-stat versus *pH*-stat strategies for deep hypothermic cardiopulmonary bypass in infants. *J Thorac Cardiovasc Surg* 1997; 114:991–1001
4. Kurth CD, O'Rourke MM, O'Hara IB: Comparison of *pH*-stat and alpha-stat cardiopulmonary bypass on cerebral oxygenation and blood flow in relation to hypothermic circulatory arrest in piglets. *ANESTHESIOLOGY* 1998; 89:110–8
5. Greeley WJ, Kern FH, Ungerleider RM, Boyd JL III, Quill T, Smith LR, Baldwin B, Reves JG, Sabiston DC: The effect of hypothermic cardiopulmonary bypass and total circulatory arrest on cerebral metabolism in neonates, infants and children. *J Thorac Cardiovasc Surg* 1991; 101:783–94
6. Kern FH, Jonas RA, Mayer JE, Hanley FL, Castaneda AR, Hickey PR: Temperature monitoring during CPB in infants: Does it predict efficient brain cooling? *Ann Thorac Surg* 1992; 54:749–54
7. Hindman BJ, Dexter F, Cutkomp J, Smith T: *pH*-stat management reduces the cerebral metabolic rate for oxygen during profound hypothermia (17°C). A study during cardiopulmonary bypass in rabbits. *ANESTHESIOLOGY* 1995; 82:983–95
8. Skaryak LA, Chai PJ, Kern FH, Greeley WJ, Ungerleider RM: Blood gas management and degree of cooling: Effects on cerebral metabolism before and after circulatory arrest. *J Thorac Cardiovasc Surg* 1995; 110:1649–57
9. Stephan H, Weyland A, Kazmaier S, Henze T, Menck S, Sonntag H: Acid-base management during hypothermic cardiopulmonary bypass does not affect cerebral metabolism but does affect blood flow and neurological outcome. *Br J Anaesth* 1992; 69:51–7
10. Patel RL, Turtle MR, Chambers DJ, James DN, Newman S, Venn GE: Alpha-stat acid-base regulation during cardiopulmonary bypass improves neuropsychologic outcome in patients undergoing coronary artery bypass grafting. *J Thorac Cardiovasc Surg* 1996; 111:1267–79
11. Murkin JM, Martzke JS, Buchan AM, Bentley C, Wong CJ: A randomized study of the influence of perfusion technique and *pH* management strategy in 316 patients undergoing coronary artery bypass surgery. II. Neurologic and cognitive outcomes. *J Thorac Cardiovasc Surg* 1995; 110:349–62



## EDITORIAL VIEWS

12. Barbut D, Hinton RB, Szatrowski TP, Hartman GS, Bruefach M, Williams-Russo P, Charlson ME, Gold JP: Cerebral emboli detected during bypass surgery are associated with clamp removal. *Stroke* 1994; 25:2398-402
13. Pugsley W, Klinger L, Paschalis C, Treasure T, Harrison M, Newman S: The impact of microemboli during cardiopulmonary bypass on neuropsychological functioning. *Stroke* 1994; 25:1393-9
14. Clark RE, Brillman J, Davis DA, Lovell MR, Price TRP, Magovern GJ: Microemboli during coronary artery bypass grafting. Genesis and effect on outcome. *J Thorac Cardiovasc Surg* 1995; 109:249-58
15. Hammon JW, Stump DA, Kon ND, Cordell AR, Hudspeth AS, Oaks TE, Brooker RF, Rogers AT, Hilbawi R, Coker LH, Troost BT: Risk factors and solutions for the development of neurobehavioral changes after coronary artery bypass grafting. *Ann Thorac Surg* 1997; 63:1613-8
16. Newman MF, Kramer D, Croughwell ND, Sanderson I, Blumenthal JA, White WD, Smith LR, Towner EA, Reves JG: Differential age effects of mean arterial pressure and rewarming on cognitive dysfunction after cardiac surgery. *Anesth Analg* 1995; 81:236-42
17. Hindman BJ, Dexter F, Cutkomp J, Smith T: Diaspirin cross-linked hemoglobin does not increase brain oxygen consumption during hypothermic cardiopulmonary bypass in rabbits. *ANESTHESIOLOGY* 1995; 83:1302-11
